# Supplementary material
Source: publisher figshare collection journal article supplement (https://acs.figshare.com/ndownloader/files/3601893)
Supplement: Supplementary file 1 [file 3601893]

# Supporting information for

## Colloidal Tin-Germanium Nanorods and Their Li-ion Storage Properties

*Maryna I. Bodnarchuk<sup>\*,1,2,§</sup> Kostiantyn V. Kravchyk,<sup>1,2,§</sup> Frank Krumeich,<sup>1</sup> Shutao Wang,<sup>1,2</sup>  
and Maksym V. Kovalenko<sup>\*,1,2</sup>*

<sup>1</sup> Institute of Inorganic Chemistry, Department of Chemistry and Applied Biosciences, ETH  
Zürich, CH-8093 Zürich, Switzerland

<sup>2</sup> Laboratory for Thin Films and Photovoltaics, Empa – Swiss Federal Laboratories for  
Materials Science and Technology, CH-8600 Dübendorf, Switzerland

<sup>§</sup>These authors contributed equally to this work

<sup>\*</sup>E-mail: bodnarchuk@inorg.chem.ethz.ch; mvkovalenko@ethz.ch

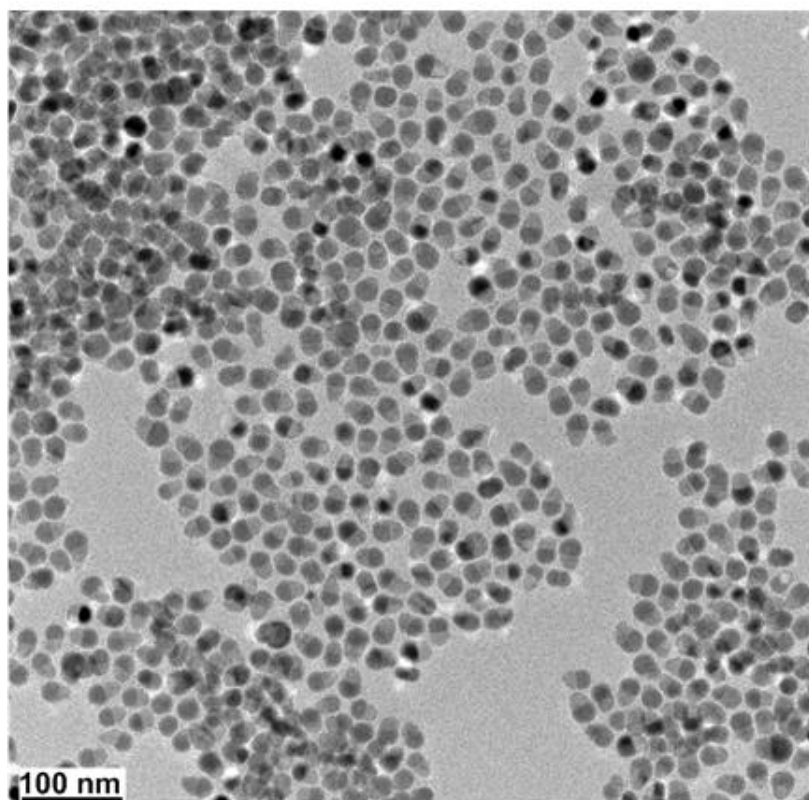

**Figure S1.** Low-resolution TEM image of Sn-Ge nanorods, corresponding to the sample shown in Figure 1 of the main text.

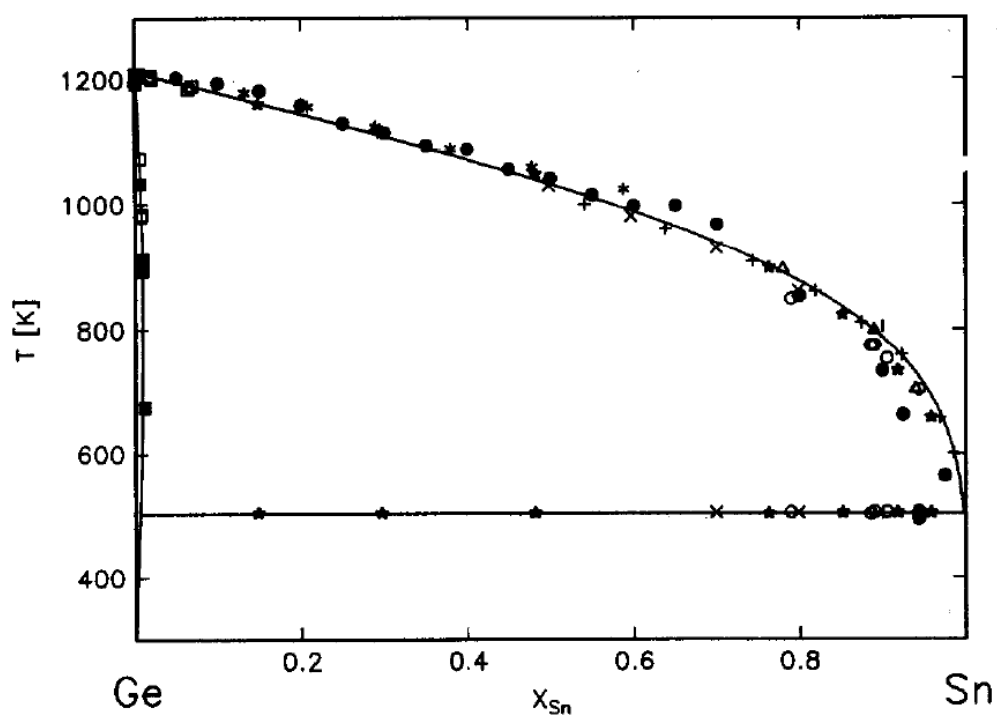

**Figure S2.** Calculated (lines) and experimental (data points) phase diagrams for Ge-Sn system, taken from Ref.<sup>1</sup> The solubilities of Ge in Sn at the eutectic point of 232 °C are systematically reported to be below 0.5% and the solubility of Sn in Ge doesn't generally exceed 1%.<sup>1-2</sup>

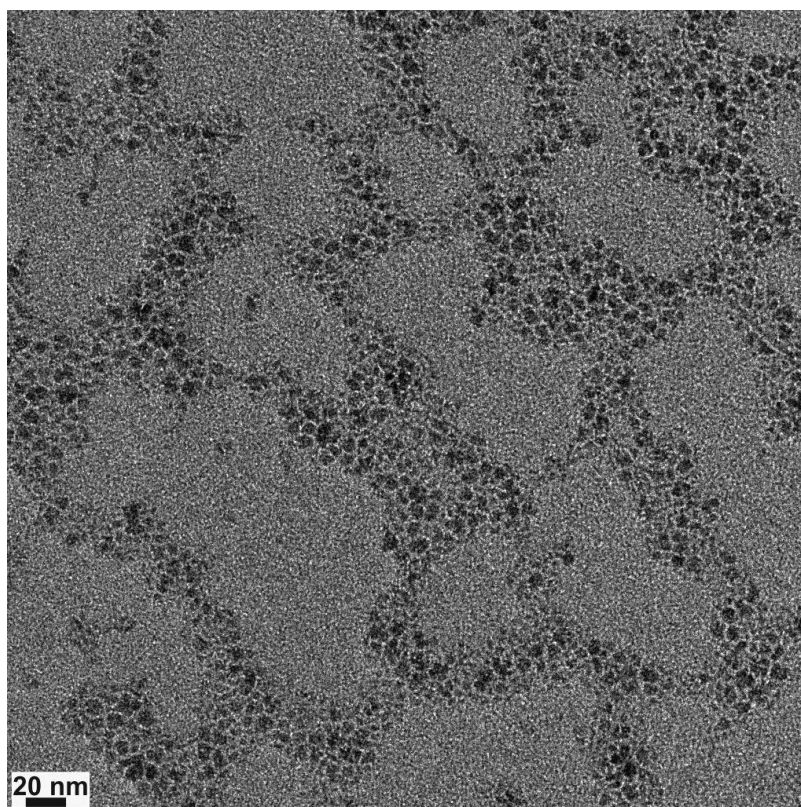

**Figure S3.** TEM image of poorly crystalline and polydisperse Ge NPs obtained in the absence of Sn NPs as seeds.

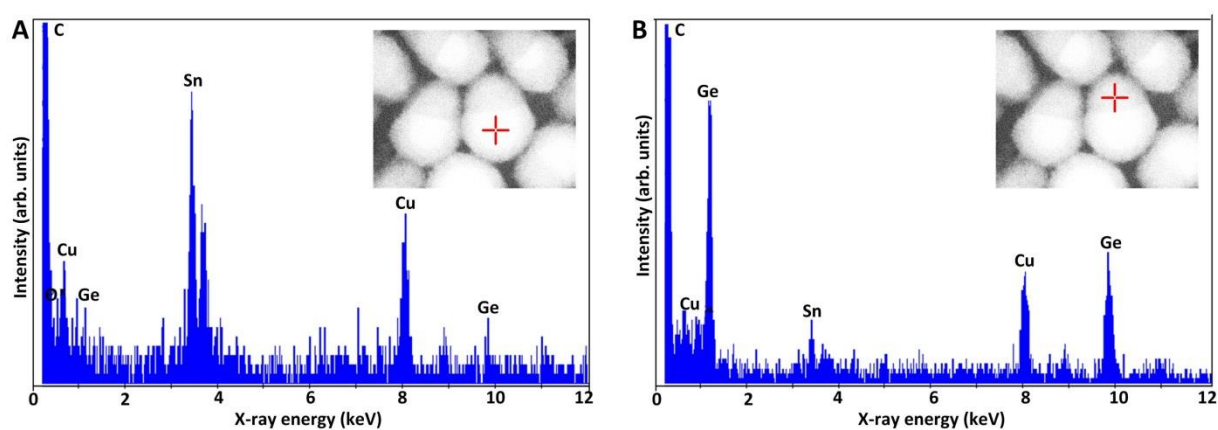

**Figure S4.** EDX spectra obtained from the Sn (A) and Ge (B) sides of Sn-Ge NRs. The Cu signal is from the copper mesh of the TEM grid.

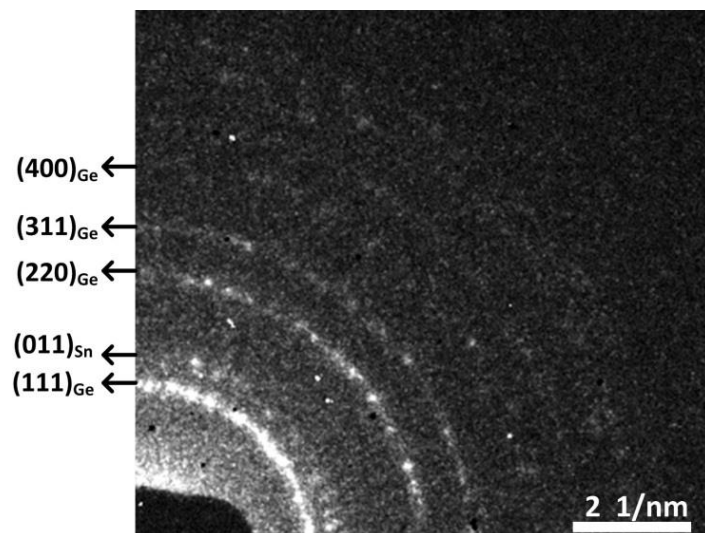

**Figure S5.** Electron diffraction pattern of 15×25nm Sn-Ge NRs; same sample as shown in Figures 1 and S1.

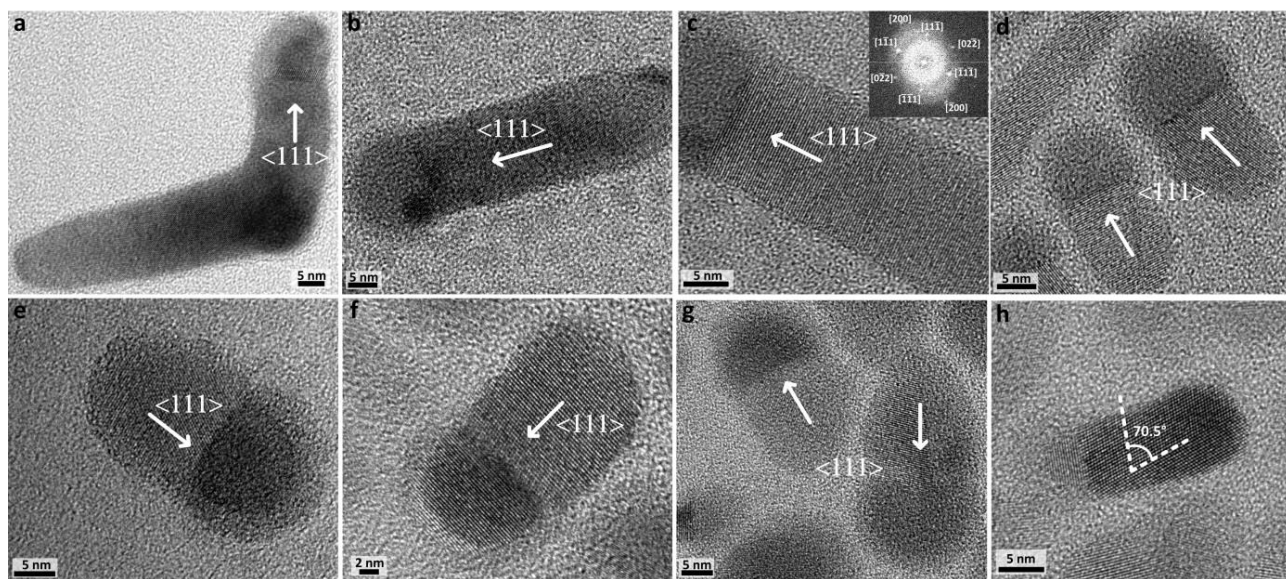

**Figure S6.** High-resolution TEM images of Sn-Ge NRs.

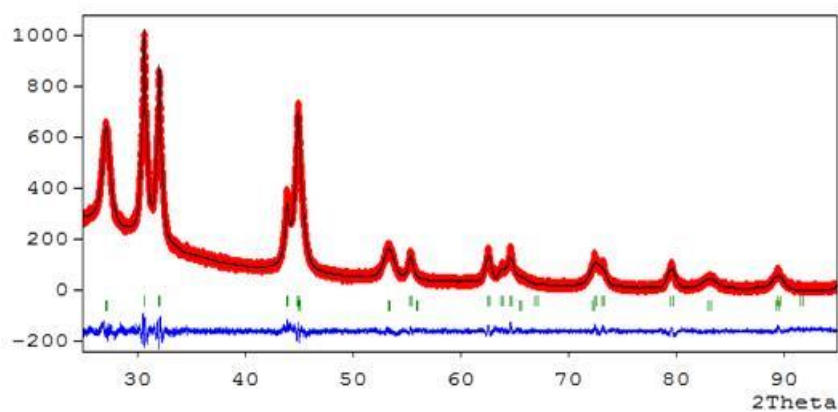

**Figure S7.** Rietveld refinement of the XRD pattern collected from Sn-Ge nanorods (see also same pattern in Figure 2B of the Main Text). The weighted pattern and profile R-factors,  $R_{wp}$  and  $R_p$ , were 3.74 and 2.91, respectively. The goodness-of-fit indicator ( $S$ ) was 1.29.

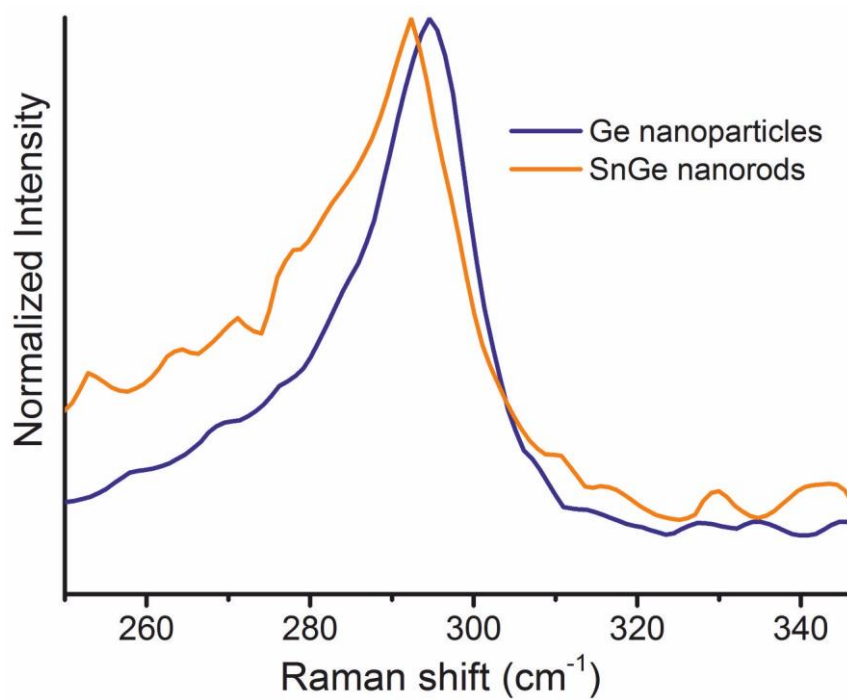

**Figure S8.** Raman spectra of Ge NPs and SnGe NRs.

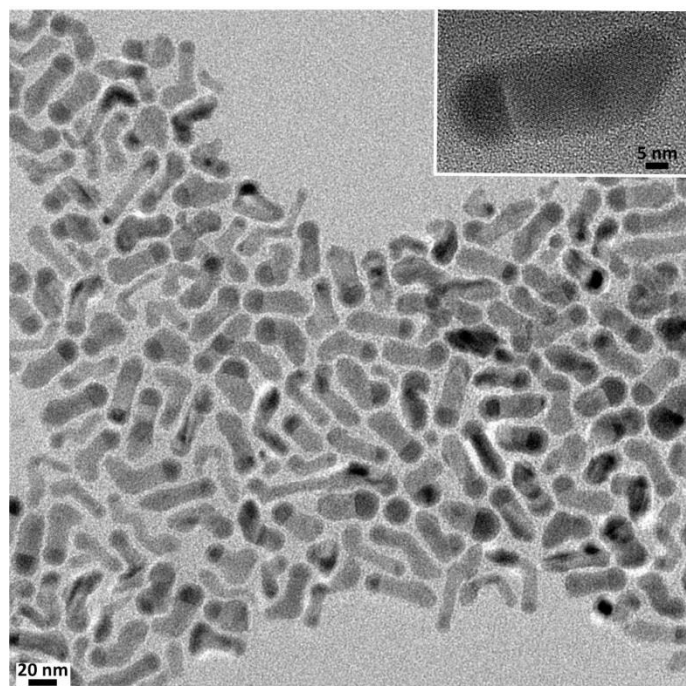

**Figure S9.** Low- and high-resolution TEM images of Sn-Ge NRs synthesized at Ge:Sn molar ratio of 25 using 15nm Sn NPs as seeds.

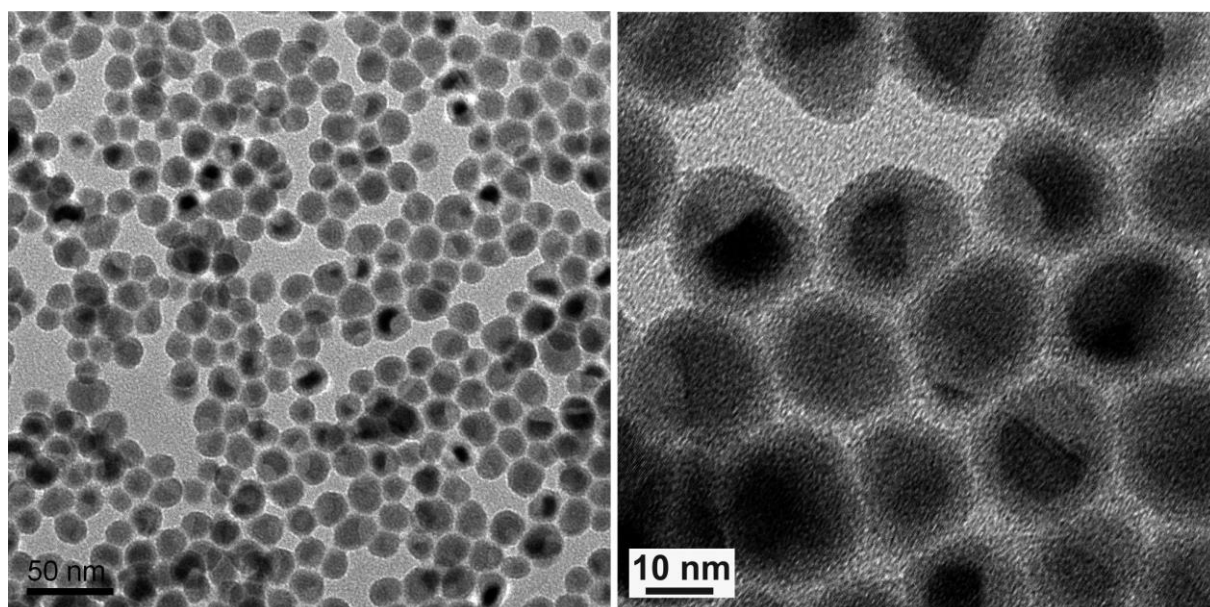

**Figure S10.** Sn-Ge NRs grown in a one-pot synthesis (Ge:Sn=10) by injecting Ge precursor at 230 °C, followed by the heating to 250 °C (ca. 2 minutes for 230-250 °C temperature ramp) with immediate cooling after reaching 250 °C.

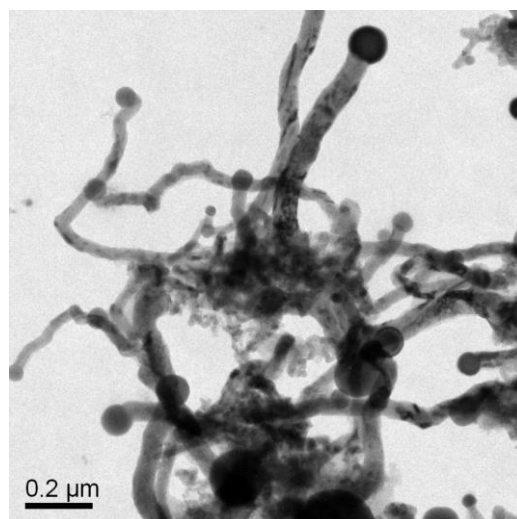

**Figure S11.** TEM image of nanowire-like Ge structures grown at 340 °C.

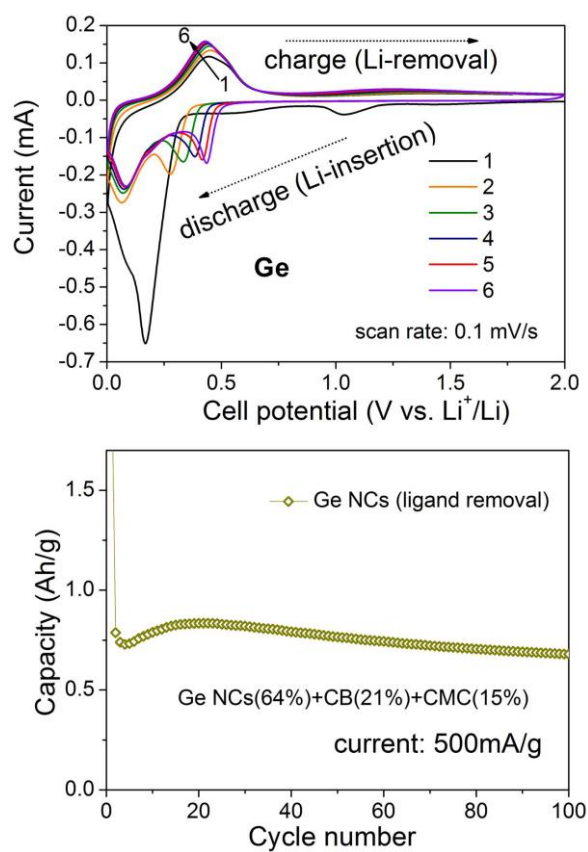

**Figure S12.** (top) Cycling voltammogram and (bottom) cycling stability test of Li-ion half-cells with colloidal Ge NPs as anode material (for TEM image see Figure S3).

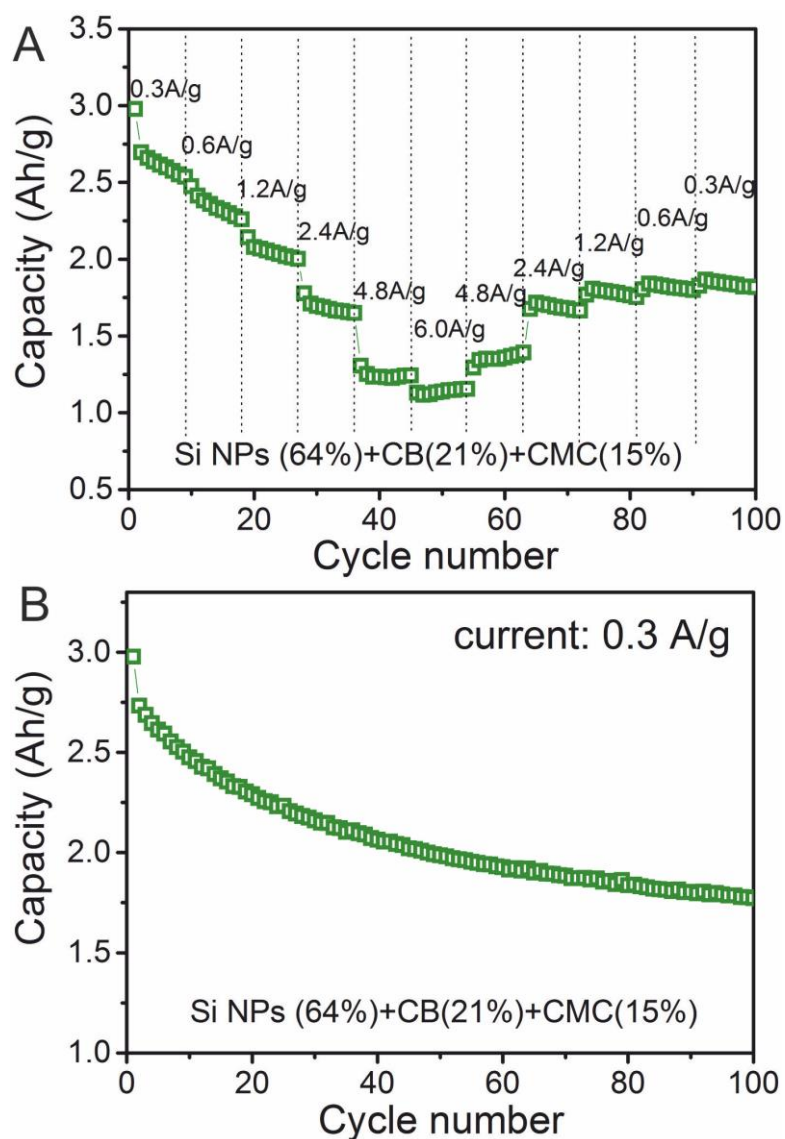

**Figure S13.** Electrochemical performance of electrodes comprising nano-sized Si powder (MTI Corporation,  $\leq 50$  nm).

#### SUPPORTING REFERENCES:

- (1) Feutelais, Y.; Legendre, B.; Fries, S. G. Thermodynamic Evaluation of the System Germanium – Tin. *Calphad* **1996**, *20*, 109-123.
- (2) Olesinski, R. W.; Abbaschian, G. J. The Ge–Sn (Germanium–Tin) system. *Bull. Alloy Phase Diagram.* **1984**, *5*, 265-271.
